# Supplementary material for: Deep sequencing of voodoo lily (Amorphophallus konjac): an approach to identify relevant genes involved in the synthesis of the hemicellulose glucomannan
Source: PubMed Central journal article supplement — Planta. 2011 May 3;234(3):515–26. doi: 10.1007/s00425-011-1422-z (PMC3162142; doi:10.1007/s00425-011-1422-z), 2011-05-03
Supplement: 425_2011_1422_MOESM1_ESM.pdf [file 425_2011_1422_MOESM1_ESM.pdf]

## Supplemental Data

### **Deep Sequencing of Voodoo Lily (*Amorphophallus konjac*): An approach to identify relevant genes involved in the synthesis of the hemicellulose glucomannan**

Sascha Gille<sup>1</sup>, Kun Cheng<sup>1</sup>, Mary E. Skinner<sup>3</sup>, Aaron H. Liepman<sup>3</sup>, Curtis Wilkerson<sup>4</sup>, Markus Pauly<sup>1,2,\*</sup>

<sup>1</sup> Energy Biosciences Institute, University of California-Berkeley, 130 Calvin Laboratory MC 5230, Berkeley, CA, USA

<sup>2</sup> Department of Plant and Microbial Biology, University of California-Berkeley, 130 Calvin Laboratory MC 5230, Berkeley, CA, USA

<sup>3</sup> Biology Department, Eastern Michigan University, 316 Mark Jefferson Building, Ypsilanti, MI, USA

<sup>4</sup> Plant Biology Department, Michigan State University, 178 Wilson Road, East Lansing, MI, USA

\* Corresponding Author: Markus Pauly  
Department of Plant and Microbial Biology  
Energy Biosciences Institute  
Calvin Lab MC5230  
University of California, Berkeley  
Berkeley, CA, 94720-5230  
e-mail: [mpauly69@berkeley.edu](mailto:mpauly69@berkeley.edu)  
Phone: (+1)-510-642-1722  
Fax: (+1)-510-642-1490

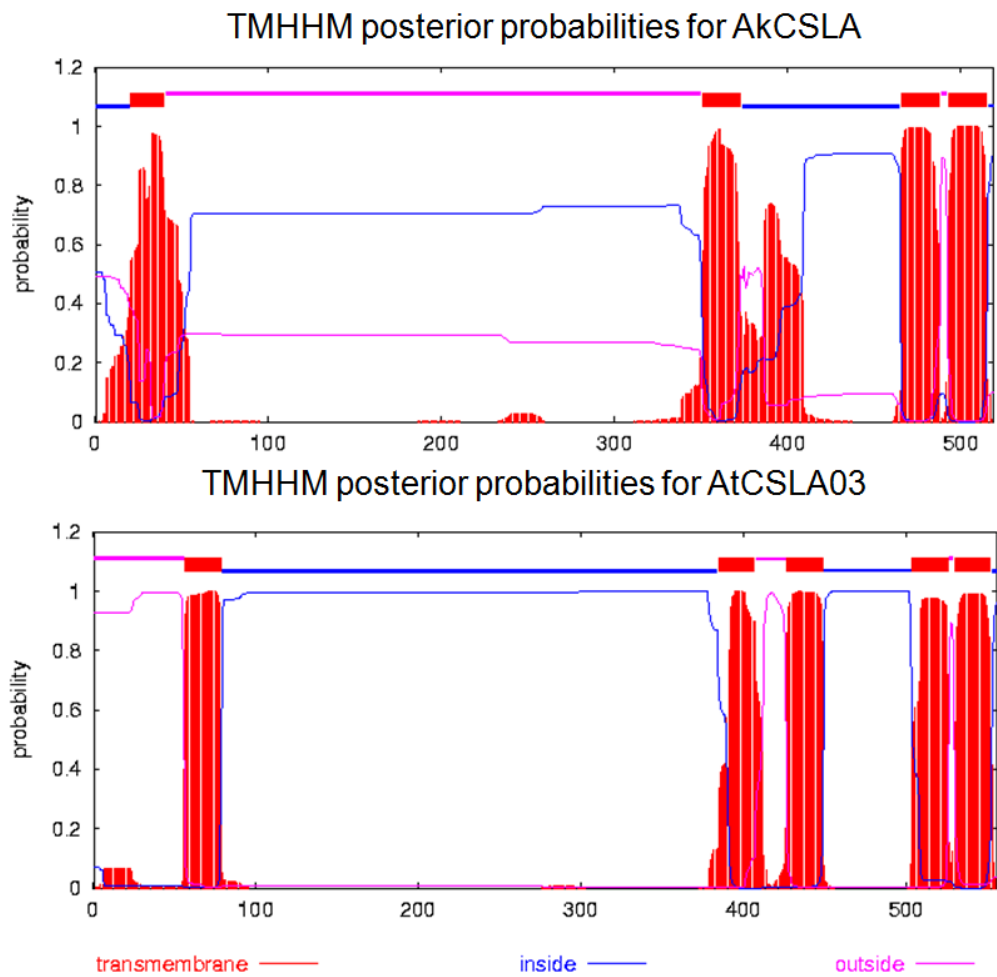

**Supplemental Fig.1** Predicted topology of the identified putative *A.konjac* glucomannan synthase AKCSLA03 and the *A.thaliana* mannan synthase ATCSLA03. The proteins were analyzed using TMHMM server v2.0 (<http://www.cbs.dtu.dk/services/TMHMM-2.0/>). The red colored areas represent predicted transmembrane domains

| <b>Description</b>                                     | <b><i>A.thaliana</i><br/>genetic<br/>locus</b> | <b>454<br/>contig<br/>length</b> | <b>EST<br/>reads</b> | <b>E<br/>value</b> |
|--------------------------------------------------------|------------------------------------------------|----------------------------------|----------------------|--------------------|
| hydrogen ion transmembrane transporter                 | At2g07707                                      | 1132                             | 34041                | 0.0                |
| 26S rRNA                                               | At2g01015                                      | 2352                             | 27449                | 2e -146            |
| metallothionein 3,MT3, copper ion binding              | At3g15353                                      | 767                              | 21098                | 7e -19             |
| rRNA repeat unit                                       | X52323                                         | 2209                             | 11931                | 3e -157            |
| rRNA                                                   | At3g41979                                      | 1759                             | 11220                | 2e -58             |
| 18S rRNA                                               | At3g41768                                      | 1243                             | 8152                 | 0.0                |
| late embryogenesis abundant (LEA) family protein       | At2g44060                                      | 2539                             | 8101                 | 3e -163            |
| mitochondrial                                          | mit. genome                                    | 692                              | 7956                 | 1e -124            |
| rRNA repeat unit                                       | X52322                                         | 1328                             | 7461                 | 0.0                |
| unknown protein                                        | At1g01430                                      | 2301                             | 7310                 | 9e -37             |
| cytosolic O-acetylserine(thiol)lyase                   | At4g14880                                      | 1431                             | 5609                 | 6e -90             |
| PDF2.5 (plant defensin)                                | At5g63660                                      | 651                              | 4920                 | 3e -04             |
| ATP:ADP antiporter (ATNTT2)                            | At1g15500                                      | 3551                             | 4661                 | 0.0                |
| EF-1 alpha (enlongation factor)                        | At1g07920                                      | 2090                             | 4531                 | 0.0                |
| ACT7 (actin 7) cytoskeleton                            | At5g09810                                      | 1646                             | 4283                 | 0.0                |
| rRNA repeat unit                                       | X52322                                         | 1418                             | 4023                 | 8e -139            |
| EF-1 alpha (enlongation factor)                        | At1g07940                                      | 1967                             | 3810                 | 0.0                |
| rRNA repeat unit                                       | X52321                                         | 1250                             | 3671                 | 4e -09             |
| PP2A-3 protein serine/threonine phosphatase            | At3g58500                                      | 2129                             | 3407                 | 0.0                |
| GR-RBP8 RNA binding / nucleic acid binding             | At4g39260                                      | 678                              | 3361                 | 2e -14             |
| basic chitinase (ATHCHIB)                              | At3g12500                                      | 1182                             | 3083                 | 7e -57             |
| ATPase subunit 6                                       | At2g07741                                      | 1375                             | 2985                 | 0.0                |
| PP2A-2 protein serine/threonine phopshatase            | At1g10430                                      | 1557                             | 2979                 | 9e -176            |
| rRNA repeat unit                                       | X52320                                         | 562                              | 2642                 | 1e -54             |
| ATJ3 chaperonin, protein binding, HeatShock protein    | At3g44110                                      | 2173                             | 2283                 | 9e -132            |
| mitochondrial                                          | mit. genome                                    | 4530                             | 2254                 | 0.0                |
| MTA2A (Metallothionein 2A) copper ion binding          | At3g09390                                      | 786                              | 2166                 | 4e -28             |
| ECT2, protein binding, interacts w CIPK1               | At3g13460                                      | 3221                             | 2109                 | 2e -114            |
| ribosomal protein                                      | mit. genome                                    | 2131                             | 2094                 | 0.0                |
| LOS2 phosphopyruvate hydratase                         | At2g36530                                      | 1804                             | 2044                 | 0.0                |
| chloroplast                                            | chl. genome                                    | 2792                             | 1937                 | 0.0                |
| mitochondrial transcription termination factor related | At1g62010                                      | 1796                             | 1883                 | 0.60               |
| maturase K (plastid gene product)                      | plastid                                        | 2441                             | 1841                 | 0.0                |
| rRNA repeat unit                                       | X52322                                         | 1825                             | 1791                 | 6e -147            |
| chloroplast                                            | chl. genome                                    | 1705                             | 1791                 | 0.0                |
| 40S ribosomal protein S7                               | At5g16130                                      | 1554                             | 1761                 | 1e -66             |
| prxp5 peroxidase                                       | plastid                                        | 1470                             | 1756                 | 7e -89             |
| ribulose-1,5-bisphopshate carboxylase/oxygenase        | chl. genome                                    | 3451                             | 1749                 | 0.0                |
| <b>ATCSLA03</b>                                        | <b>At1g23480</b>                               | <b>2014</b>                      | <b>1706</b>          | <b>2e -140</b>     |

| Description                                          | <i>A.thaliana</i><br>genetic<br>locus | 454<br>contig<br>length | EST<br>reads | E<br>value     |
|------------------------------------------------------|---------------------------------------|-------------------------|--------------|----------------|
| <b>putative starch synthase, glycosyltransferase</b> | <b>At1g32900</b>                      | <b>2186</b>             | <b>1649</b>  | <b>7e -171</b> |
| HSP60 heat-shock protein 60, ATP binding             | At3g23990                             | 590                     | 1603         | 1e -66         |
| chloroplast                                          | chl. genome                           | 2636                    | 1578         | 0.0            |
| rRNA repeat unit                                     | X52320                                | 659                     | 1578         | 0.0            |
| unknown mRNA                                         | AF083679                              | 1452                    | 1515         | 1e -67         |
| translation initiation factor SUI1                   | At4g27130                             | 993                     | 1512         | 1e -86         |
| ACT3 (actin 3) cytoskeleton                          | At3g53750                             | 808                     | 1498         | 1e -123        |
| Histone H3.2                                         | At4g40040                             | 1216                    | 1495         | 5e -110        |
| 60S ribosomal protein L39                            | At4g31985                             | 889                     | 1443         | 6e -39         |
| chloroplast                                          | chl. genome                           | 2401                    | 1413         | 0.0            |
| ribulose-1,5-bisphosphate carboxylase/oxygenase      | chl. genome                           | 4129                    | 1381         | 0.0            |
| ARFA1D GTP binding, phospholipase activator          | At1g70490                             | 1206                    | 1356         | 4e -169        |
| chloroplast                                          | chl. genome                           | 1893                    | 1351         | 2e -103        |
| ubiquitin-protein ligase, ribosome constituent       | At2g28830                             | 5838                    | 1347         | 2e -70         |
| 60S acidic ribosomal protein P0                      | At3g09200                             | 1455                    | 1305         | 0.0            |
| UBC10 ubiquitin-protein ligase                       | At5g53300                             | 920                     | 1291         | 6e -115        |
| S-adenosyl-L-homocystein hydrolase                   | AY256916                              | 1836                    | 1278         | 0.0            |
| unknown protein                                      | At1g15270                             | 587                     | 1256         | 5e -15         |
| other RNA, unknown                                   | At4g36648                             | 2019                    | 1255         | 1e -04         |
| 30S ribosomal protein                                | AB022325                              | 1483                    | 1201         | 4e -136        |
| ribosomal protein S27                                | mit. genome                           | 1425                    | 1193         | 6e -58         |
| ARFA1D GTP binding, phospholipase activator          | At1g70490                             | 1910                    | 1191         | 1e -161        |
| ATGPX6 glutathione peroxidase 6                      | At4g11600                             | 879                     | 1171         | 2e -109        |
| chloroplast                                          | chl. genome                           | 1526                    | 1139         | 6e -83         |
| senescence associated protein                        | At3g48140                             | 1283                    | 1133         | 5e -27         |
| 60S ribosomal protein L28                            | At2g19730                             | 1476                    | 1129         | 7e -57         |
| ribosomal protein S12                                | mit. genome                           | 1163                    | 1120         | 0.0            |
| <b>UTP-glucose-1-phosphate uridylyltransferase</b>   | <b>At5g17310</b>                      | <b>2602</b>             | <b>1101</b>  | <b>0.0</b>     |

**Supplemental table 1.** Contigs with  $\geq 1100$  EST reads (top 67). The 454 sequencing data were assembled into contigs and aligned to the *A.thaliana* nucleotide sequence collection using BLASTN (Altschul *et al.* 1997). Contigs in bold type are part of Table 2 and Fig.4

**Supplemental table 2. Assembled contig sequences and Genbank accession numbers of identified *A. konjac* (Ak) glucomannan and starch biosynthetic genes. N.A. – not assigned as the coding sequence is not complete.**

|                           | <b>GenBank accession: HQ833588</b>                                                                                                                                                                                                                                                                                                                                                                                                                                                                                                                                                                                                                                                                                                                                                                                                                                                                                                                                                                                                                                                                                                                                                                                                                                                                                                                                                                                                                                                                                                                                                                                                                                                                                                                                                                                                                                                                                                                                                                                                                                                                                                                                                                                                                                                                        |
|---------------------------|-----------------------------------------------------------------------------------------------------------------------------------------------------------------------------------------------------------------------------------------------------------------------------------------------------------------------------------------------------------------------------------------------------------------------------------------------------------------------------------------------------------------------------------------------------------------------------------------------------------------------------------------------------------------------------------------------------------------------------------------------------------------------------------------------------------------------------------------------------------------------------------------------------------------------------------------------------------------------------------------------------------------------------------------------------------------------------------------------------------------------------------------------------------------------------------------------------------------------------------------------------------------------------------------------------------------------------------------------------------------------------------------------------------------------------------------------------------------------------------------------------------------------------------------------------------------------------------------------------------------------------------------------------------------------------------------------------------------------------------------------------------------------------------------------------------------------------------------------------------------------------------------------------------------------------------------------------------------------------------------------------------------------------------------------------------------------------------------------------------------------------------------------------------------------------------------------------------------------------------------------------------------------------------------------------------|
| <b>AkCSLA3</b>            | AACGTACCAGGGGAGCCAAGAAATGGAGGGCCTAATGAAGGTGCCTACCTGCCTCGCTCCCTCATGACTCGATCATGGGGCCGGAAATTTGTCGTTTTGGCCGGAGATGGCCATCGACTGGCCGAGAATCCTCTACATTTGGGGTCAGGTGAGAACCATGGTCTTATCCGGCAATGAGGATCGCCGTTTGTGTGCCTCATCATGTCCGGTGATGCTGCTAA                                                                                                                                                                                                                                                                                                                                                                                                                                                                                                                                                                                                                                                                                                                                                                                                                                                                                                                                                                                                                                                                                                                                                                                                                                                                                                                                                                                                                                                                                                                                                                                                                                                                                                                                                                                                                                                                                                                                                                                                                                                                             |
| assembled contig sequence | TGGAGAAGCTCCTCATGGTGGTGTGAGCCTGTACGTGAAGGTCTCCGCCGGCGGCCAAGAAGGTCTACAGGTGGGAGCCCGTGGGAGGGGACGAGGAGTTGGGCACTGCAGCCACCCAATGGTCCCTCGTCCAATACCCATGTA<br>CAATGAGAGAGAGGTTTTACCACCTGTCGATCAAAAGCTGCATGCTGCCTCCAAATGGCCGTGGATCGGCTGATCGT<br>CCAAGTTCTTGATGATCCACAGACCCAATGATTAAGGATCTCGTGTACAAGGAAATGCCAGAAATGGGCTTGGAT<br>GGGGTGAACATAAAATATGAGACAGGGCCAACAGAAATGGGTACAAGGCCGTGCCTCAAGGAAGGAATGAAG<br>TACAGTTACGTGGAGGAGTGCCACTACGTGCCATCTTTGATGCCACTTCCAAGCAGACCCGACTACCTTTGTC<br>AGATGGTACCTTTTCTCATCCAACCCGGAGATCGGTCTCGCTCAGGCTCGTGGAACTTTGTAATGCTGAGGA<br>GTGCTTGTGACAAGACTACAAGAGATGTAAGTGCCTACCCTTCAAGGTGGAGCAGGAGTCAAGGCTCATCCATT<br>CATGCATTTCCGGCTCAATGGAAGTCTGGGGTTTGGAGAAATCCGGGCCCTTAATGAAGCCGGAGGTTGGGAG<br>GACCCGCCACTGTGGAGGACATGGACTTGGCCATTAGGGCGACTCTTGAAGGTGGAAAGTTTGCTACGTGGGA<br>GACGTCAAGGTTAAAAGTGAATACCAAGCACTTTCAAGGCTTTTCGCTACCAACAGCAGTGCATGGTTCATCGGGC<br>CCGCAATCTGGTGGAGAAAGTGGCAATAGAAATCCTGATGACTAAGAAATGCCCAGTGGGAGAAATTCATCT<br>ACTTACAATTTCTCCTCACTCGAAAGATCGTAGCTCATTTCGTCACCTTCTCTCATTTGTGTGCTGTGTTCCAA<br>AGCCGTGTTCTTCTCAAATCAGTATTCATTATGGGCAGTGTGCATCTCCGACAACCATCACGATCCTTAATG<br>CTTGTTGAAGCAGCAAGTCTATTCATCTGATAGTGTCTGGACCCCTATTGGAGAATGTCATGGCACTCCACCGTTC<br>AAAGGTGTAATCATCGGTTTGGAGATCGGGAGGGTCAACGAGTGGTCCGTCACAGAGAAAGTTGGGTGATGCA<br>CTAAACTCAAACGAAATGGTAAATAAAACTTTGCAAGGAAAGCTCGTACCAGTACTCCAGAGATTCCTCTT<br>GGAGATTGGGCTTGAACAATACCTCATCATCTGTCATCCTATAAATACATGCAACCAACTATTGCTACATTTA<br>CATCTATCTACAATCTCTGCATTTTGGTGTGAGGACTTGGTATGTTGGCACTTTGTCTTAGTGAAAGTAGA<br>GGATGAAAGGAGATGAAGCCACCATTTCCCAATGTTCCCTTGTGGTGGATGCCATGATGGAGGAGAAATCTAC<br>CTTTGGTCTTTGTGTGTAATGGTTCACCAATATGGCCCAATATTTATTTCCTATATATGTGAAGTGGATGAT<br>TCTATTGAAAGAGCTTGAAGGTGTCATTAACATTTGAAAAAAAAGAAAAAACAAAAATGTCCGCCCGCTC<br>GGCTCTATGGCCACTCTGCGTTGATAACCACTGCTTCCGGCAGTAATGGCCACTCTGCGTTGATACCACTGCTC<br>CCGGCCGTAATGGCCACTCTGCGTTGATACCACTGCT                                                                                                                                                                                                                                                                                                                                                                                                                             |
| <b>Ak starch synthase</b> | <b>GenBank accession: JF727262</b>                                                                                                                                                                                                                                                                                                                                                                                                                                                                                                                                                                                                                                                                                                                                                                                                                                                                                                                                                                                                                                                                                                                                                                                                                                                                                                                                                                                                                                                                                                                                                                                                                                                                                                                                                                                                                                                                                                                                                                                                                                                                                                                                                                                                                                                                        |
| assembled contig sequence | TATTTTTTTTTTTTTTTTTTTTTTTTTTTTTTTTTTTTTTTTTTTTCGGCAATCGTAGGTAATACCTTCCCCTCTGC<br>GTCAAACATCCTAAGATTATCAAGGTCCAAGATAGGAGGCTTATCAAGAAGAACAAGCCTCGAAGGCCTGTC<br>TCAGCCTTTTATCTTCACTAAAGGCTTAGGCATATATAGAACGGGAACAACAGGAAACTACAACCAAGGGAGCAG<br>GCAACGCCTATTAACCTTGCTGATGATCCCTTACAGCCGAGTCACTTTGTCAGCAACGACGAACTTCTCCTTCT<br>ACCTCGATCTAGCTCCACTTGGGGCAGTGAAGGCCCTCGTAGCTCCTCCTCCTCCTTCTTGGGAGGCCCCCTT<br>CAGGAAAGATCTTAGCCATGCAGTTTCCGGATCATCTGAGAGAATTTGGTCTGTCCCATACACCAGGAATAGCCCTC<br>TCACAGTCGTGCAACTGCTTCAACATCCTTTGGGTCACGCGCATCAAAATCAACATGGAAGGCCCTCCATATGAAA<br>ACCAGTGACCCATCAACATGGTTCCTACTAGCCACCCTGTGTCCACACATAGATGGCTCCCATACTGCATT<br>GCCTGCAACTGAATAAGACCACATGGCTCAAATCTGCTGGTAATTAATAAGATCAGCTCCAGCAAAAAGCTTGTG<br>AGCCAAGACAGCATCAAAATTTGCTATTTCCTTGTCTTGTGCTGATAATCTTCCCTCGAGCTTCATAATTTGCTTCTC<br>CATGACTTTTCTCCAGTACCAAGGACCACTATCTGAACATTTTACGAATGAACTTGGGAATGGCAGCAACTAAGA<br>TGCTGAACTTTCTGTTCTTAGTCTACCAATAAAAGCTATGAGAGGGATGTCAGGATCCAATGGCAACCACTG<br>GTTGCTTGGACATCCTCCTGTTAAGAGCTTTGTCATCAGGACCGTGTAGAAATCATAAATTTGCAACAGATATATTG<br>TCAGTAAGTGAATCCACACATCAACATCCATTTCCGTTCACAATCCAGTAATGCCAGTCTTGCGGATGATGTTATC<br>CAGTTCAACACCTTAGCGACACCAGAGACAACCTTTACGCGTAATATGGGCTCACAGTGAAGACTTTGTCTGCT<br>TCTAGAAATCCAGCTTTTATCCAGTTAATTTTCTCCCTTTTACAGGCTTGTATATCCATCAATAAAATCAAACGAG<br>CTCTTAAATGTTTCTGGGAGATTAAGAAATGAAAGTCAAGAAAGGCAATCTGCCCTGGATGCCATATTGTGAAT<br>GCAAAAGGCCACCTTCCGCTTCTGTAGAGGCCATGCAAGTTGTCATGCTCTTCCAGGTAGCATGGAGAACTCCA<br>GTGTGCCAATCATTACAGCAAAATACAACATCCTCTCCATAAGGCCAGAAATGATTTGTTGTTATTACAGATTAAG<br>ATGCGAGGAGCTTCAAAGCAGCAAGACATAGCAAAAGTGAACCTTATCTGGTTGTCTTTGTAATCTTCCCAGCGA<br>CGGGACCATACAATTTCTCCAGTTTTCCCCATACCTTTTCCAGAAATAAAGGATGGTCAATGAACACACATCA<br>ACACCTCTTTATAGCAGTGAAGAAACGTACAGTGTACACAGTGTCCCGACTTTGATCTCAAGCAGAAACACTGG<br>TATCCATGCACTCCTGATGATCATAAGCTGGTATACGGTTCATGACACGCTGCCCAAGTTTCGCAAGAGCAGG<br>AGGCAAGCCCCAGCAACGTCACCTAAACCGCAGTTTTGCTCCATGGGGCCACTCTGTGATACAAGACTATG<br>TTGCTGCTGCTTCAACAGTATAGCTTCAAGGGTTTTGCACTTTTACACAACAAACACCCAGAACGCTGACTAGC<br>TTGCTCATCCGGATGCCCTCCTTACGGCTTGTGTGGAGCTCACTTTCCCGACCGCCTCAGCCATGAAAAGTG<br>GTGGCTTGGTTTCAAGCAAGCAACCTCTCTGCTCTCTGCTTGGTCCAGTCACTTACTCCCCCATGAG<br>CACTCTCGAGATGATCGTTGAAGCAGTCACAGTTCATTTGCACGATTTAATCTGATCTCTCACCGCAGGTTT<br>GGGGGTTGATCGGAGACTTCCGCCGCGTAATG |

**Ak UDP-D-glucose  
pyrophosphorylase (UGP2)**

**Genbank accession: JF727263**

assembled contig sequence

---

```
ATCTCTTCCAGGCCGCTCGAGTCCCTTTCTACTTGGCGCTCCGCTTCCGTCGCCGGAAGCTAGGTCGGCTCC
CGATCCCAATGGCTGCCGTCCGCGAGGCTCCCTCGTCAACGAGGCCGAGAAGCTCGCGAAGCTTCAGGCCG
CAGTCGCCAGGCCCTCGACCGATCAGTGAGAACGAGAAATCTGGTTTCATCAGCCCTCGTTCCGGGTATCTGAGT
GGAGAAGCACAGGAAATCGAATGGAGTAAAGATCCAGAGTCTACTGAGGAAGTGGTCGCTTATGATAGCTT
GGCGCTGCCCCAGAAGATTTCCGTCACACGAAAGAACTCTGGACAAGCTTGTGTGCTAAAAGCTCAATGGAGG
TCTGGGAACAACGATGGGTTGCACTGGTCCAAAGTCTGTTATTGAAGTTCGAAATGGCTTGACATTTCTGACCTG
ATTGTCAATCAAAATGAGTCTCTGAACATCAAGTATGGATGCAATGTTCCCTCCTCTTAAATGAACATTTAACAC
ACATGAAGATACACAGAAGATTGTAGAGAATATCCAACCTCAAAATTTGAGATACATACCTTTAATCAGAGTCAAT
ACCTCGTTTGGTGTGAAGATTTCTGCCACTACCAAGCAAGGAAAGACTGAGAAAAGATGGCTGGTATCCCTC
CGGGGCATGGTGATGTTCCTCTCTTATGATGAACAGTGGTAAACTAGAGGCCATGTTATCACAGGGTAAAGAGT
ATGTCTTTCATCGTAACCTCTGATAACCTGGGTGCTGTTGTTGATTTGAAAAATAATCACTTAAATCCACAATCAG
AATGAATACTGCATGGAGGTGACGCCAAAACCTTGGCAGATGTTAAGGGTGGTACCTAAATTCATATGAAGGAA
GGGTTGAGTCTTGAATAGCACAGGTTCCAGTGAACATGTCAATGAATCAAGTCAATCGAAAAATCAAGAT
ATTCAACACCAACAACCTGTGGGTGAACCTGAAGGCCATTAAGCCCTTGTGAGGCTGACGCACTTAAATGGA
GATCATTTCCAAACCTAAGGAAGTCCATGGTGTGAAGGTTCTTCACTAGAAAACCTGACGCTGGTGCAGCCATTCC
TTTCTTTGATAATGCTATTGAGTCAATGTTCTCGATCTCGGTTTCTCCCTGTGAAAAGACTTCAGACTGGCTG
CTTGTTCAGTCAGATTTGATACATTAAGTACCGGCTTTGTTATACGGAATGAAGCCAGAAATAATCCGGCAATC
CTTCTATTGACCTGGGGCCTGAATTTAAGAAGGTTGGGGACTTCCCTCAACCGCTTCAAGTCCATCCCGAGCATC
TTGAGCTTGATAGTTTAAAGGTTTCTGGTGAAGTGGTTTGGTGCCTGACATAGTGTCAAGGGCAAGGTGGTCCG
TCAGTCAAAATCCTGGGGTGAATTTGAAATTTCCAGACGGGGTGTGATCGAGAACAAAGGTATCAACAGCTCCTG
ATGACATTTGAACGCGCACACGATTTCCCTTTCGACGATGTTTCTTCTCGCTGGGCTAGCTTTGCCATGTTGG
GGCCAAAGCATGACGTGTTTGTGAGTTTGAATGTCAACTCGTACCTTGTAAATAAAAACTTGGAGCTTTTGGAG
AATGCCCTCTGAGAAATGTTCTCTCCTTACAAAAAAGAAAAAACAACATGTCCGGCCGCTCCGGCTCTTAA
AGCAGTGGTATCAACGCAGAGTGGCCATTACGGCCGGGGCTCCCTCCGCGCCGCTCCCTGCGCCAGCCCTTGG
GCTCTCCTCTGCGATCTCCTCGGGCTTCTTCACTCCAGGAGAGCGAAGATGTTGGTTTATCAGGATCTGCTCAC
AGGTGACGAGCTTCTCTGACTCATTCCCATACAAAGAGATTGAGAATGGAATGCTGTGGGAAGTTAAGGGGAA
GTGGGTGGTTAAAGGAGCGGTTGACGTAGATATTGAGCAAAACCATCTGCTGAAGGTGGAGGGGAAGATGAAG
GTGTTGACGATCAAGCTGTGAAGTTGTTGATATTGTGACACATTTCCGCTTCAAGGCAACCTCTTTCGACA
AAAAGCAATTTGACCTTCATGAAGCGGTACATCAAGAACTGACACCTAAGTTGGATGCCGAAAAGCAGGAGA
CATTTAAAAGCAGATGAGGCTGTACAAAAATTTCTGCTTCAAAACTGAAAGTCAATTTTTCGTTGGTGAG
AGCATGCATGACGATGGTATGTTGGTGTGTTGCTTACTACAAGGACGCTGCCAGCCACGCTTATTTTGTACTC
GCTTATGGTCTAAAGGAGGTGAAGTGTAAAGCAGGAGAGAGGAGATTACCACCGGGGCTGGACGTGTTGTAC
TCTAAGCTTTTCTTAAAGTTTCAACTTTACTTCTATCTTAACTTCTTATTATTTGGAGAGACAAAACATGTGGT
GGCTTTCTTTTATGTTTTTTGTTTATCTCGCCCTTCAAGTAAAGTAACTCTCGGTGCTTGCATTTGCCAACT
GACTTCATATTTATCTATTTGAATTTAGAAGAAAAA
```

---

**Ak Phosphoglucomutase**

**Genbank accession: JF727264**

assembled contig sequence

---

```
AAGCAGTGGTATCAACGCAGAGTGGCCATTACGGCCGGGAAGCAGTGGTATCAACGCAGAGTGGCCACGGCCG
GAAAGCAGTGGTATCAACGCAGAGTGGCCATTACGGCCGGGAAGCAGTGGTATCAACGCAGAGTGGCCATTACG
CCCGGGAAGCAAGTGGTATCAACGCAGAGTGGCCATTACGCAGAGTGGCCATTACGCCGGGAAGCAGTGGTA
TCAACGCAGAGTGGCCATTACGGCCGGGAAGCAGTGGTATCAACGCAGAGTGGCCATTACGCCGGGAAGCAGT
GTATCAACGCAGAGTGGCCATTACGGCCGGGAAGCAGTGGTATCAACGCAGAGTGGCCATTACGCCGGGGGA
CTGTGACACCGAGCACCTCCTCCTCCTCTCTGTACTCTCAGGATAGAGAGAGCGATGGTGTGCTTACCGG
TCGCCAAGAAAGAGACCCCTCAATCGATGGCCAGAAAGCCCGCACTCCGGCTCAGGAAGAGTTCACAGT
GTTCCAGCAACCTAATTTCTCCCAACTTTTGTCAAGCTACATTTCAATGCGCTTTCACCCAGCAATGTCAGAGT
GCAACTATTGTTGTTCTGGGGATGGTGCCTATTTCTCTGAGGAAGCAATCCAGATTACGCTAAATGCTGCT
GCAATGGAGTAAAGCAGTGTGGGTTGGACAAAATGGACTGCTCTCAACAGCTGCTGTATCTTGTGTACAGT
GAAAGAGTTGGTGCAGATGGATCTAAGGCATCTGGAGGCTTATCTTTCAGCAAGTCAACAATCCTGGTGGTCCA
CATGAGGACTTTGGAATCAAGTACAACATGGAATAATGGTGGACTGCTCTGAGGGCAATCTGACAAAGTCTAT
GCCAACACGACGACAATTAAGAATATTTATAGCAGAAGATCTCCAGATGTAGACATTTCTACTGTTGGGGTAA
CAAGCTTTGAGGGACCTGATGGACCATTCGATGGATATTTTGAATCAACAGATGATTACGTCAGTTGATGAA
GACAATTTTGTACTTTGAGTCCATCCAGAACTCTGGCATCTCCAAAATTCACATTTTGTATGATGCACTTCATG
GTGTTGCTGGAATTTATGCCAAGCCTATTTTGTGGAAGAGCTCGGGGCAATGAGAGTTTCAATGCTGAACTGTA
CACCTAAGGAGGACTTTGGTGGTGGCATCCAGATCCCAACCTACCTATGCAAAAAGAAATTTGGTGGCAGCATG
GGACTAGGCAAGACAGCCCTGGAGGGTGAACCAACAGAGTTTGGTGTCTGCTGCTGATGGCGATGCTGATGTA
TATGATCCTTGGTAAAAGATTTTGTGACTCCTTCGATTTGTTGCCATCATTGCTGCAATGCAGTCAATCCA
TTCTTATTTCAAGCTCCGGCTTGAAGGGTGTGCCAGGAGCATGCCACATCAGCTGCATTTGATGTTAGCAA
AAAAATTAATCTGAAATTTCTGAGGTGCCACTGGCTGGAAATTTTCCGGAAATCTGATGGATGCTGGAGTTG
TTCATATGTTGGTGAAGAAAGCTTTGGGACTGGTCTGACCATATAAGGGAGAAAGATGGAATCTGGGCACTT
AGCTTGGCTCTATCCTTGCCTTCAAGAACAGGGACAACCTTAATGGAGGCAAACTTGTGACTGTGGAAGACAT
AGTTAAGGAGCACTGGGCTACTTATGGTCCGCACTTATATACTCGTTATGACTATGAAATGTTGATGCAAGTGA
GCAAAAAGAGCTCATGGCATATTTGGTTAAACTGCAGTCACTCGCTTCTGATGTAACAAGATTTAAGAGGATCA
GATCAGATGTTTCAGATGTTGTAGAAGCAGATGAGTTCGAATACAAGATCCTGTTGACGGTCTTATATCAAAGCA
CCAGGGAATCCGTTATCTGTTGGGGATGGATCAAGATTTGGTTTTCCGCTCTCTGGAACCGGTTCTGTGGGTGC
AACTATTCGCTCTACATCGAGCAATATGAGAAGGATTCTGCAAAAGACTGGAAGGGATTTCAAGAGGCACTTGC
TCCTCTCGTGGATGCTGCGTTAAAGCTTCAAAGATGCAAGAAATCACTGGGGCTGCGGCTCCCACTGTCATCAC
ATAGATCGAAACAACCGAGGCTAAAGGCAGACGCTGATCAACTGTTATCCTATAGTATTTCAATTTTGTCCAACCT
AAATGTTGGCTGTGACATTTGAGATATAATGCCTCAGTTCCCGTTTTACCCCGTGCATAAAAAGAACTACAG
ATCAACATGTGATGCTGTTTTACATAATATGAATACTGCATGCCCGCAGGGTGTTCGGACCAATAAGAAAGCTA
CAGGATGATGCCATGTTGGTAATTAATCCTGGCGTCTTTTATGCTTTTTGGCGAGGGTTTGAAGGCTACCCTG
AAATTTGCTTTGTTCTTGAAGCCACCATATTCGGTGTCTGATGATTTCTATGTGAATGTGAGGGCCGAAAGT
GGCAGGCGTTGATCCTAGTAACCTCCAATGATGGATTCTGTTTATGTTAGGCTTGTTCGACAGACATAGAA
AGGTACTTCAACAGTCAAGAGATCTGAGTTGTTTATATATCATAATTCGGAAGATTTGGGTTGGCGTTTTA
```

---

**Ak sucrose synthase**

**Genbank accession: JF727265**

assembled contig sequence

```
AGACCACTGTATGCGGTGTGGGTGGGGGTTGCTCCCAAAGCGATGGTGTAGCATCAACCCTCCGACGAC
TGGTCCCTTGTACGCTCGCCGACGAACCTAGAACTCCGTAGGGAACACGCCCGCAGGGAGCAACACGCA
GCCCAACGCGCGCTCACCTCGTTCTGTTCCTTTCTCCTCGGAGGACAGAGACAAGAAGCGGTC
GCCGTCCGGAAACCATGCTCCCAAGCTAGGCCGGGTTCCGAGCATCCGGGATAGGGTGGAGGACACCTTT
CCGAGCACCCCAATGAGCTCGTCCGCCCTCCTCCAGGTACATGGGGCAGGAAAGGGGATCCTCGAGCC
ACCACCTGCTCGACGAGTTCCAGCGTCATCGCAGAGGACCGCGGCCCAAGCTCGAGGATGGACCTTCT
TCGAGGCTCAAGACTGCCCGAGGAGCCATAGTTCTGCCTCCATTCTGAGCCATCGCAGTCCGCCCCGGC
CGGAGTCTGGGAGTATGTCAGGGTTAACGTGTACGAGCTCAGCGTCCGAGCAGCTGAGCGTGTCCGAGTAC
CGGCTTCAAAGAGGACTCGTCGATGGACACTTCAACGATCGTTACGTGCTGGAGCTGGATTTCCAGCCCTC
AACGTGTCTTCCCAGACCGAGCCTGTCTGTCATCGGCAACGGGGTGCAGTTCCTCAATCGCCACTCT
CCTCCATCATGTTCCGCAACAAGGATTGCTTGGAGCCGCTGTCTGACTTCTTCCAGCCCATAAAGTACAAGG
CCATGCTTGTAGGTAACGATAGAATACAAAGTTTATACAGACTCCAGCTCTGTTTGGCAAAGGCAGAGGAGC
TCTTGTCCAAGCTATCTCCAGAACCTTTCTTTGAATTTGCATACAAATCCAAAGAATGGGATGGAGAAAG
GGTGGGGAGATACAGCTAAACGTGCATTGGAGATGATACATCTCCTTCTGGCAATCTTCAAGCCCTGATCT
TCCACTTTGGAGACATTTCTGGGGAGGATTCCTTAGGTGTTCAATGTAGTCAATGTTCTCCTCATGGATACTTT
GGCCAAGCAAATGCTTAGGCTTGCCTGACACAGGTGGACAGATTGTATACATATGGACCAAGTTCGTGCAT
GGAGAATGAAATGCTTTAAGAAATGAACATCAGGGGCTGAGTGTGAAACCTAGAATCTTGTGTAAACGAGAT
TGATACCCGATGCAAAGGAACAACATGCAACAGCGGCTTGAAGGATCAGTGGAAACGACGACTGTCAT
CCTAAGGGTTCCTTTCAGGACTGAAAAAGGAAATTTCCGAAATGGATCAAGGTTTGTATGGCCCTACCT
AGAGACATTTGCAGAGGATGCATCAAGTGAAGTCTGCGAGATTGCAGGGCATCCAGATTTAATCATTTGGCA
ACTATAGTGTAGGAAATCTTGTGATCTTTGCTAGCGTATAAGCTAGGAATCAGCAATGCAAAATGGCGCAT
CGGTTGGAGAAACCAAGTATCTGACTCCGACATTTATTGAAAAAATATGAGGACAAGTATCATTTTTCATGT
CAATTCACGGCTGATTAATGCAATGAACAATGCAGATTTTATCATAACCACTACCTACCAAGAGATTGCAGGA
AGCAAAAATGTTGGGCAATATGAGAGCCACTGCTTTTACTTCTCCGACTTCCGCTACTCCGCTACTCCGATGGC
ATTGATGTTTTGATCCAAATTTAATGTTTCTCCGGGAGCAGACATGGCTATTTATTTCCATACTCTGAAC
ATGAAAAACGACTGACTTCTTTCATGGTTCAATGAAAGCTATTTATTTGATCCAGACAAATGAGGAGCA
TTGGTCGATTGGATGACCGTCAAAGCCATTAATTTCCATGCAAGGCTGATAAAGTGAATAATCATGTC
GCCTGTTGAGTGGTTTGGTCAAAGCCCTGACTAAGGGAATAGCTTAACCTTGTGTGGTGTGCTGTGCAAC
GATGCAAGAAATCAATGACAGGGAAGAAATTAAGAGATTGAAAGATGCATGAACCTATGAAGAATAAAC
ATGGATGGTCCGATGGATATCTGCCAAACGAACGAGGCGCTAATGGTGTGAGCTTACCGTATATAGC
AGACACAGGAGGTATCTTGTGAGCCCTGCTTTTATGAAGCATTGGGGATGAGGCTTACGAGGCTATGAGGCT
GTGGTCTTCAACATTTGCTACTTCCACGGAGGCGCTGCGGAGATCATTGACATGGTGTATCAGGGTTTCA
ATAGACCCATATCATCCAAACAGGCAACCAATCTCATGATAGACTCTTTGAAAAAGTGAAGGAAGACCCAG
ATATTGGACTAACATATCTGAGGAGGACTAAACGAATCCATGAAGGTACACATGAAAGATTACTCTGAAAG
GCTGATGACATTTGGCTGGGTTTATGTTTTCTGGAAGTACGTTTTGAAAGCTTGAAGGGCCGAGCCGCGCA
TATATTGAGATGTTCTACATTTAAAATTCGGTATCTGGTGAATCTGTGCCACTTGAATGATGATTAAGC
AATGTGCCTTAAGGAGGAGGATGAATCCGGTGGCAGCAGCTGATAAATTTCCATGGGCAAGTATAGGGTGT
GAAGGGTGTGCGGTGACCTGAGGGCAGCAGTTTTATCGTCTGCTGCTTCTGCTTGTGATAAATAACGAT
TAAGGTTTTCTGAAATAAAGGAAATCCCGAATACATGTGTTTTCTTAAACAGTTGAGAAACAAATATGCCCTGC
ATTTATGTTGTGGATATTTTCATGAAATATTGAGGGCTACATGCCATGTTTACTTTAA
```

**Ak ADP-glucose  
pyrophosphorylase**

**Genbank accession: JF727266**

assembled contig sequence

```
CTTCTCCTCCTCCTCCTCCTCCTGTTTCTTCTCACTGCTGGAGAAACCTGCGGCAGAGACCTTTT
TGGCTCTCAAGGGTCTGGACATCGGGTCTCCTCGGCTTAGAGGTGGTCTCTCTCTGTATGTGTGTG
GATCAGCACCAGAGAGCTGACTTTCAGTAGGTTCTGGTGAAGTGGGACTTATAACGCCTTCTCCGGACCTTAA
CAACAGAGGAAGCAAAAGGAGGAAAGAAAGAAAGGAGACAGAGAGGAGAGATCTGATTCTGCAA
ACATGGATGCGCAGCAGTATGATGGTCAAAAGCTTCGGTCCCAACGCCCCGTTGTGAACCGGTACACCCGCCA
AGGGGTGGCGGTGGCATCTGAGGGGAGACCAATCTGGGGAGATGAAGTGGCGTGGGAGTTCAGAGA
GCAGAGGAATATGGGGCACCACAAAGTTGCCAATGAGCTCTGGGCAACAGGGCTCCGGCTGCCAGAAGGC
ACACAGTCCCGCGGGCGGACTGTCTGCCATCCTTACTCCAGAATCAGCAAGGATACCTTGACCTTCCA
GTCGCCATTTTGAAGAGGAGTGGGCAACCCGAAGAAGCTGGCTGCGATCCTCGGTGGAGGTGCCGG
GACTAAATGTTCCCTCTGACTGGCAGAAGAGCTGAGCCTGTGTCCCATTTGGAGGTTCCATCGGCTTATTG
ACATTTCAATGAGCAACTGCATCAACAGTGGGATAAACCAAGATTTATGTGATCAGCAGTTCAATCTTGGTCT
TTAACCCCATCTCGCTCGCACGTACAACCTTTGGGAATGGTGTAAATTTGGGGATGGATTTGTTGAGTACTG
GCAGCCACCCAAACTCTGGTGAAGCTGGAATGAACGTTTTAGGGAAAGCTGAGTGTGAGACAAATTC
TCTGGGCTTTGAGGATCCAAGGAACAAGACATAGAGCAGTACTGATCTGTCTGGTATCAGCTTACAGA
ATGGATTATATGGACTGGTGCAGAGGCACATGGACACTGGGGCAGATATTACGGTTTATGATGTACCCGTTGGA
CGACAGCCGTGCATCTGACTTCCGATTGATGAAGATCGATAAGGTTGGCCGGATTTGCCATTTCTCGAGAAAC
CTAAGGGTCTGTTCTGGATGCCATGAAGGTTGACACCACAATTCCTGGGTTATCTCCTTATGAAGCCAAAAAT
TTCCCTACATTCGATCGATGGGAGTATATGCCTTCAGAACAGAAATCCTTCAAACCTCTGAGGTGGAGGTAC
CCAACATCCAATGATTTGGATCTGAAATCATTCTTCTGCTGTAATGAGTACAATGACAGGCTTATCTCTCA
AGGACTCTGGGAGGACATGGAACAATTAAGACATTTCTTGGGCAAATTTGGCTCTCACAGACTCAGTCCCA
AAATTTCAATTTTATGATCCTCAGACACCATTCTACACATCACCCTGTTATTTGCCGCTACCAAGTGGATAAT
GCAGGATTGTGGACTCCATCATATCCCATGGGTGTTTCTAGATCAATGCAGTATTGAACATCAATTTGATGGT
ATCGGTCACCGTTGGAGTACAACGTCGAACCTGAAGGACACCATGATGATGGGTGCCGACTACTACAACTGAA
GTAGAGAGAGCTGCCCTCCTAGCAGAAGGAAAGGTTCTATTGGTGTGGGCAACAGACTAAAATGAGGAATT
GCATCATTGACAAGAATGCTAAGATCGGGAAAAATGTTATCATTACAAACAAGATGGTGTGCAAGGAGCTGAT
CGGCCAAGTGAAGGTTCTATATCAGGCTGGGCACACTATAACTGAAAGAACCAACATCAAGGATGGGAG
AGTCATGAAATGCTTGGGGACAATAAAGAAACCGTTTTCTGTGGTATTCCCGACTCAAGGAGAAATGCTCG
GACCTCCTGGTGTGATCAATCATGTACAGATGAAACGTGAAATGACACCTCTACTTTAGTCTCTCTGTCC
GCAACCCAGCAGCATATTTGATCCGGAGGAAAGGTTCTATGATGACAGTCTCTAGGATTAATACGTAGTGAATA
AAGGATTGTAGCAGCTACAATGTTGATACATTAAGAAATTTCTGATCCATGCTTAGAGCTTAATAATGATACCAT
GTTCTGAAACGCGCCGATGGCAGTGTCCATCTCTGTTTTGTGAATGTTTTCTTCTTATCTGTTGTTGGGAGA
CAATAAATTTACTTGTGGTCTTGTGCCAGCAACTGTATACATGTTTATGAGTTGTAGCTGCCA
```

**Ak ADP-glucose pyrophosphorylase**

**Genbank accession: JF727266**

assembled contig sequence

---

```
CTTCCTCCTCCTCCTCCTCCTCCTCCTCCTGTCCTGTTCTTCTCACTGCTGGGAAACCTGCGGCAGAGACCTTT
CTGGCTCTCAAGGGTCTGGACATCGGGCTCCTCCTCGGCTTAGAGGTGGTCTCTCTCTCTGTATGTGTGTGT
GGATCAGCACAGAGAGCTGACTTTCAGTAGGTTCTGGTACTGGGCACCTTATAACGGCTCTCCGGACCTT
AACAACAGAGGAAAGCAAAAGAAAGGAGAAAGAAAGGAGACAGAGAGGGGAGAGAGATTCTGATTCTG
CAAAACATGGATGCCAGCAGTATGATGGTACAAGCTTCGGTGCACACGCCCCCTTGTGAACCAGGTCACACC
GCCAAGGGGGTGGCGGTGGCATCATGGAGGGAGACCAATCTGGGAGATGAAGTGCCTGGTGGCAGTTC
AGAGAGCAGAGGAATATGGGGCACCACCAAGTTGCCAATGAGCTCTCTGGCAACAGGGCTCCGGCTGCCA
GAAGGCACACAGGTCCCAGCGGGCGGACTGTCTCTGCCATCCTTACTCCAGAAATCAGAAAGGATACCTTGA
CCTCCAGTCGCCATTCTTGAAGAGGAGTGGGCAACCCGAAGAACCTGGCTGCGATCATCTCGTGGGAG
GTGCCGGGACTAAATGTTCCCTCTGACTGGCAGAAGAGCTGAGCCTGCTGTCCCCCATTGGAGGTTCCCTATC
GGCTTATTGACATCCAATGAGCAACTGCATCAACAGTGGGATAAAACAAAGATTTATGTATGACCCAGTTCAAT
TCTTGGTCTTTAACCGCCATCTCGCTCGCACGTACAACCTTGGGAATGGTGAATTTTGGGGATGGATTTGT
TGAGGTACTGGCAGCCACCAACTCTGGTGAAGCTGGAATGAACTGGTTTCAGGGAACGGCAGATGCTGT
GAGACAATTCATCTGGGTCTTTGAGGATCCAAGGAACAAGAATAGAGCAGTACTGATCTTGTCTGTGAT
CAGCTTACAGAATGGATTATATGGACTGGTGCAGAGGCACATGGCACTCGGGCAGATATTACGGTTTCAT
GTGTACCCGTGGACGACAGCCGTGCATCTGACTTCGGATTGATGAAGATCGATAAGGTTGGCCGGATTGTCC
ATTTCTCTGAGAAACCTAAGGGTTCTGTTCTGGATGCCATGAAGGTTGACACCAACTCCCTGGGTTATCTCCCT
TATGAAGCCAAAAATTTCCCTACATTCATCGATGGGAGTATATGCCTTCAGAACAGAAATCCTTCTAAACCT
CTTGGGTGGAGGTACCCAACATCCAATGATTTTGGATCTGAAATCATTCTCTCTGTGAATGAGTACAATG
TACAGGCTTATCTCTCAAGGACTACTGGGAGGACATGGAACAATTAAGACATCTTCTTGGGCAAAATTTGGC
CTCACAGATCAGTCCCAAAAATTTCAATTTATGATCCTCAGACACCATTCTACACTTCTGTTATTTGGCG
CCTACCAAGTGGATAAATGCAGGATTGTGGACTCCATCATATCCCATGGGTGTTCTAGATCAATGCAGAT
TGAACATTCATTTGATGGTGTCCGTGACGCTGGAGTACAACCTGCAACTGAAGGACACCATGATGATGGT
CCGACTACTATCAAACCTGAAGTAGAGAGAGCTGCCCTCTAGCAGAAGGAAAGTTCCATTTGGTGGGG
CAACAGACTAAAATGAGGAATTCATCATTGACAAGAAATGCTAAGCTGGGAAAATTTTATCATTACAAACAA
AGATGTTGTCAGGAAGCTGATCGGCCAAGTGAAGGGTCTATATCAGGCTGGGCACACTATAAATACCTGAA
GAACACAACATCAAGGATGGGACAGTCAATGAAAATGCTTGGGACAAATAAAGAAACCCCTTTCTGTGGTT
ATCCGACTAAGGAGAATAGTCTGGACCTCCTGGTGTGATCAAACTGATACAGATGAACCTGAGAATTTG
ACACCTCTACTTTAGTCTCTCTGTCGCAACCCAGCAGCATATTTGGTACCGGAGGAAAGGTTCTATGATGACG
TCTGTAGGATTAATACGTAGTGAATAAAGGATTGTAGCAGCTACAATGTTGATACACTAGAATTTCCGTATCC
ATGCTTAGAGCTTAATAATTGTATACGATGTTCCGAAACGCCCGATGGCAGTGCCTACTGTTTGTGTA
ATGTTTCTCTTTTCTGTTGTTGGGAGACAATAAATTTACTTGTGTCCTGTGCCAGCAACTTGTATACA
TGTTTATGAGTTGTAGCTGCCA
```

---

**Ak Glucose-6-phosphate isomerase**

**Genbank accession: JF727267**

assembled contig sequence

---

```
CCAGAGGCCGAGAATGTGCAAAGGCGAGCAGTTGAGATTCCTTGCAATGTTGATCCAATCGATGTTGC
TCGAAGCATTGCTGGCCTTGATCCTGAAACTACATTAAGTTGGTGGTTTCAAACCTTTTACAACAGCTGAA
ACTATGCTGAATGCTCGAACACTGAGAGAATGGATTTCTTCTGCACTAGGGCTGAGGCGATTGCAAGGCAT
ATGGTAGCTGCAGTACAACCTTGGACTTGACAGAAGTTTGGCATTGACCCTAATAATGCTTTCGCAATTT
GGGACTGGGTGGTGGTCTGTTAGTGTCTGCACTGCTGTTGGTGCCTTCCCTTGTCCCTACAAATATGGTT
TTTCAGTAGTTGAAAAGTTTCTGAATGGTGGCGGAGCATTGACAACCTTTTCCGTTCCACTTTTGGAAA
AACGTGCCCTTCTTGGGTTTAAAGCGTGTGGAATGATCTTTTTCTGGATATCCTGCCAGAGCTATAC
TACCATATTCAGGCCCTGGAAAAATTTGCACCATATTCACAGGTAAGCATGGAGAGTAATGGGAAGG
GTGATCAATTTGATGGAATCCCTCTTCCCTTTGAGACAGGGGAGATGATTTTGGAGAGCCTGGAACAATG
GTCAGCATAGCTTTTATCAGCTGATCCATCAGGGCCGGGTTATCCCATGCCATTTTATTGGTGTCTGGAAGA
GTCAGCAGCCAGTTTACTTGAAAGGTGAACCAAGTGAAGTAACTATGATGAGCTTATGTCACACTTTTTCACACA
ACCAGATGCCCTTGCTTATGGGAAGACACCTGAACAGCTGTTGAGTGAGAAAGTCTCTGATCATCTTATTC
TCACAAGACTTCTCTGAAAATCGGCCATCATTGAGTATTTGCTGCCTGCTTAAAGCTTATTAACACTGGGA
GAGTTGTTGGCGATGATGAGCACAGGATGCTGTTGAAGGTTTCATCTGGGGTATCAATTTCTTTGATCAG
TGGGAGTGGAGCTAGGCAAGTCTCTGGCTTCAAGTGAAGGAAAGCAACTTCACTTATCTGCACAGCAGG
GGAGCCTGTTAAGGGATTTAACTACAGTACTACAGCACTGCTAACAAGATATCTCGAGGCTGAAACCGGCT
CCCATCTGGTTCTTCCACTGTGCTACCGAAGGTTAAATTTTACATCCTCGGTGAATGTTTTTCCGGGCTTT
TCCACAACCTGCAGCTGAGATATCTGAGTTATGTGAACCTTGGTTGAAATTCCTGAGCTGGGACTGATGTG
GCTTCCACTTGTGTAATCGATGTGAATAACCCAAAACCTGCTTATTAACAATAAATCCCCCGCGTTTTA
CGTGAATAATTTCAACCTTTTGTGAATGTTTCATATCTGTTGAAAATGGTGAATGGTGCATCCAAGT
ATGAGATAAGTTGCAATCTCAGCTTTTTT
```

---

**Ak Phosphomannomutase**

**Genbank accession: JF727268**

assembled contig sequence

---

```
CGGCCGGGAGATCTGGGGCGGCTTTGTTCTTTTGGGTTTATACTCAAGAGGAATCTGGGAAGAGAAG
GGAGCAGAATCTGATCGGAGCTCTGATCTGTAACATAGCGTAAAAATATGGCTGGAAGGAAGCCGGGTGT
GATTGCTCTGTTGATGGTGGATGGGACACTAACAGCTCCAAGAAAGGTGGTGACCCTGAGATGCTCGAG
TTCTTGCAATAGCTACAAGAGGTTGTTACCGTCGGTGTGTTGGAGGATCTGATCTTGTAAAGATATCTGAA
CAACTTGGGAAAAACAGTTATCACTGACTATGATTTATGCTTTTTCTGAAAATGGCCTCGTGGCCACAAAAAT
GGGGAATTAATTGGAAGTCAAGCTTGAACAGTTTCTTGGGAGGATAAGCTCAAGGAGTCTTAAATTTT
TACCCTTATTACATTGCAGACTGGATTTCCAATAAAAAAGGGGAACATCATTGAGTCCGAAAGCGGGAT
GCTTAATGTTTACCAATTTGGCGAAACTGACCAAGAGGAGCGTATGAGTTGAAAAGTATGATAAGG
TTCATAATAAGGCCAAAAATGGTGTCTGTGCTTCGGGAAAATTTGCACACTTGAAGCTTGGCATTTTCTA
TTGGAGGGCAATAAGTTTTGATGTGTTTCCCTCAAGGTTGGGATAAAGACTACTGTTTGGAGATACCTGGAG
GGCTTTGAAGAAATACACTCTTTTGGGGACAAAACATACAAGGGAGGAAATGATCATGAGATTTATGAATCT
GAAAGAACTGTGGGTACACAGTCAAAGGCCCTGAGGATACGGCAGCAGTGCACAGTCTCTCTTTCTGA
CCAAGCAGGCTGGAGTGAATGAGCTGTGGTGTGACCGTAGATTTTTCGCAAGTACATGTCACCCG
ACGATTCAGGAGCTAAGCCATTTCTGTGATTATTGATTATAGTATTAGTATTGATGATGCAAAATGCATA
TGTAATCCACATACTACCAGCCCATATTTCACTTGAATGAACAAGCCGAAATAAAGTCTTT
```

---



**Ak GDP-D-mannose pyrophosphorylase**

**Genbank accession: JF727269**

assembled contig sequence

CGTACGCTTGTCAAATCAAATGTTAAATTAAGAAAGAAATGGCATATCCTCTGTGCAAGGGTGAAGGA  
AACAAACACCAATTACGGTGTGTTCCGAAATGGCTGCAATAATCTCCGAAAGATGCCAGGAAATCTCT  
GTGAGGGAGACAAAAGAAAGGTTAAACAGAGCAGCTGGAGGGATGGTATCGGTTATCGATGCCGAAA  
CCATGGTCTCGAAGCAGTTGATCCCGTCAACTCCGGAGGCCAACGCCGCCCGGGTGTGGCCCTCTTC  
CCCAGTTCCTGCGGCATGTCTGTGCTGTGGCTTCCTTCGCCCGCCGCCGCCGCCGCCCGCCCTTATG  
GTTGCTCCTAGGGACTTCCCAAGCCCAGATCCACTCCCGGCCCTTCCTTCTCGCGGGACAAGTCCGG  
GGTGGAGCTGAAAATAGACATGGCCAAGAAAGTCCATCGTCAATACCCACCAAGACAAGTGGTGGAG  
AGAGAGAGAGAGAGAGGACGCAGCTTGAACAGTACATGGACAACATGGACTTGGGCCACTCACATC  
ACATGACGATCTCAGGCTTCAATATGCTGGACTTGTCTCCTGTGGGGGAGCACCACCCCGCCATTGC  
TGAAAATCTCATCGCCACATGCAGCTCCTCCCGAGGATGGTCAATGTTCTCCACCCCGCCCACTGCC  
CAACAGTGGAGTGCCACCCGATGATACTGCTGGAGACGCAGCGGTCTTCTGATGCGGGCCCCCGCG  
ATCACCGTGCACTCGACAGCCGAGCGCCGGCTCGACGACGCAG

**Ak Cytosolic invertase**

**Genbank accession: N.A.**

assembled contig sequence

AAAGGATTATGACATGACTCCGCTTAAATCCAAATTTACACATTTTCCACGGGGAACAAGTCATAC  
AGGATCTAACATTATAACAAAATATCCAACAACAGAACGACGCTCGAGTGACCAACCCAGAGTGGCGA  
TTGACATGGCCGCCAGTTTAGCAGCGATCACCTTCAAGAGGGGCTGTGGCGGCTCCGAACTGTGAAT  
TGACCGGCAAGCTCAGCCAGAAAAGTCCATCTGATGAGGTAGTTTCAAGTGTCCCCACGACGATCCACT  
AGCTCCAGAAATACATAAATGGTCTCTCAGATAAATCTACCAGTGGGTCTTGTAGGAATGCATGGCAGCC  
GCCAAGCTTCACTCAGAAGTTGTGCAAGCCTCACCACTACAGCACCCATTTATGGAAATCATCCAAAT  
AAGGATTTTCATTTTGTTCGTCGTGTTTCAACTTCCCATTTATCCATAGCCGAAAAGTCTTGTGATGA  
GCCTGGTTCTTCTCCATCACTTCCATACGCATAGTTTACTTTTCAAATCGTCTCCAGACTTCCGCGG  
GTTGAGCACCGGTCTCTGAGGCGGGGAGCATATCGTTAACTTCTCTCGCGCTCTCGAGCAT  
CTCCGCTGCCGACGCAGAAAGCAGAGCAGACCCCGAGGAAGACGAAAGAGGGGTCTTCCACCT  
CTTCCGAGCGGGTTTCTCTCCTCCGACTCCGGCTCTGCGCGGCCGCCCTTCTCCCGCCTTTTCG  
ACGGTGCAAGGCAA

**Ak Starch branching enzyme**

**Genbank accession: N.A.**

assembled contig sequence

ACCTTAAACATATATTTCTGGTAGGTCTGCAAGTTAATTAAATATAGATAAATAAATGCTTGTACGGT  
ACATGCTCGTGCCGAGCTACTGGCAAGGATGCCAATTCCAACCTCACTTGACAAAAATACGGCCAGCG  
AAAAAGAAAGACTACAATCTGGAGGCAACAAAAGCTGAAGAGGCTGACGGAAACCTGCCGACGGAT  
TGTAAGCAGCTGTTCCAGTTGGGGGATGATAAAGAAATGGTCTCGTGTGAGGTGCGTGTCCGTCTCA  
TGCAAGCTCCTGAATGCCCTGTGCCCATGAGGTGCGACTTCTCTGAAATGCAAGAAAGATATAAGTCCAA  
CGTAGGAGTGTGACGTTCTCCGGCGGAGCGCTGGCTACTAGAACCATGATATTTCTGGACTCAAAAA  
CTCTCAGCCCGGTCACTCTCCAGAGGCATAAACAACACAAGTTCTACTGGGAATACACACAG  
AAAGATCGAGGCTCTTGTCAAACCATCCTCAGCAGTGAAGTACTCTGCGGTTGGATCTACTCGGCCG  
AACCCACAAATAGTTTATCATCGAATCTAAGACCACCTTGATTTTCCAGGCTTTGCACAGCCAACCT  
GTAGTCGAAGTAGT

**Ak Mannose-6-phosphate isomerase**

**Genbank accession: N.A.**

assembled contig sequence

AAACAACAACATACTATATATATATCAAAAAGGCAATCATAGTTAGGACAATTTCTCAGAATAATTTTTAA  
TTTTCTAAGATAAATTTACATCTCCAGCGGCACAGAAACAAAGATTAATCTACAACACTACCGTAGTCA  
TCTAACAAAGCTAGTGCAGTATCCTCACTACACTCCACCATCTCACACCTCATGGGCCGAGCCACAA  
GCTAGCTAGCTAGTGCAGGGCGATGCGACCGATGGTGGCGCAACCACCGAGCCGTAGTAGAGATGCC  
TCCCTATCTTGAAGCCGCCGGTACCACCCGATGTCTGGTCCGTACAGAGCGAGCGCCTCCCT  
TCCAAGCTCGCGCCGAGCACGCGCCCTCCCTCAGGAAACGGG

**Ak Phosphofructokinase**

**Genbank accession: N.A.**

assembled contig sequence

TAATGGCAACAGAAATAGATGGGACAAATCCGCAAGGATCAACAACCCGGCTGACCTCATAACTTTTGA  
CCTTTTCAACGTAACAATGCAATGATGGGCATCTCGTAGCCTCAGACATGAACCTTCTCCCTCTATTCA  
ACATACATCCGAGGTGAATGACTACAGGTAGGGGAGAGAAAAGATAGAAGCAATAGTGAAGAGATC  
AGTAACAACATAAAGGCATACAGATTCACTAATCAACTGCAGTACTTTGGCATTCTCCAGATAATGAGGAA  
GAAAGTAGACACTACACACACTTGAGTTTGTGCAAGTGAACCTTTCTCATGAACAATGACATGCATTC  
CTGGACATTCCTGTTGGGTTCTTTTCAAAGCAGCTGCTCCTGAATTGCTTTGGCAGAAATTCAAAA  
AGCAACTGAGATTGATTCGGAGTCTTCTTTTCCACAACCCACCTTCATCAACAACATCATGAGTAGAAT  
TTCAATAGTCTGCAATGAGTTGTGACCTCGGGAATAAATCAATTAAGCCTTCTGGTATGAGAATGA  
CACCATAGTTGAGCAAGCTTCCACGCTTGACAGATTATCTGTTATGATGACAGTACTTTTCAAC  
GTTTGTCTTTTGGCAGCAACCTCTTCTCAATTAAGGTAATGTTGGATGAGTTGCAAAGCACATTTCCA  
GGTAATGTGAGAAGCAGCACGCCCTTAAGCCTGACAAA

**Ak Hexokinase**

**Genbank accession: N.A.**

assembled contig sequence

CCGGCTACCATCCCTGGGGCAGTATCTGTCCCAACTTCTTCCAGAAATGCCGACAACCCGCGGGCGG  
CAGCTGAGCTCCTCGCTTGGCCACAGCATACATACCTCAATGACTAACTTCTCTCGAGGGAAGTA  
TTAGTAATCTTAGAATATCTTTAACGTTGGTCCCAACAGCTTTGAGATCAAGGGATGATCATGATGCAT  
GGCTGACATATGAGGAGTCCGTAATATGAAGGAATGCTAGT
